# Supplementary material for: Incidence of Invasive Fungal Infections in Liver Transplant Recipients under Targeted Echinocandin Prophylaxis
Source: MDPI journal article supplement (doi:10.3390/jcm12041520), 2023-02-14
Supplement: s1 [file s1]

*Article*

# **Incidence of Invasive Fungal Infections in Liver Transplant Recipients under Targeted Echinocandin Prophylaxis**

**Robert Breitkopf, Benedikt Tremml, Katharina Simmet, Zoran Bukumirić, Margot Fodor, Thomas Senoner and Sasa Rajsic**

## **Supplementary Material**

### **Contents**

**Table S1.** STROBE Statement - Checklist of items that should be included in reports of cohort studies.

**Table S2.** Comparison of patients with and without targeted antimycotic prophylaxis (n = 224).

**Table S1.** STROBE Statement - Checklist of items that should be included in reports of cohort studies.

| No.                       | Item                         | Recommendation                                                                                                                                                                                                 | Page    |
|---------------------------|------------------------------|----------------------------------------------------------------------------------------------------------------------------------------------------------------------------------------------------------------|---------|
| <b>Title and abstract</b> |                              |                                                                                                                                                                                                                |         |
| 1                         |                              | (a) Indicate the study's design with a commonly used term in the title or the abstract                                                                                                                         | 1       |
|                           |                              | (b) Provide in the abstract an informative and balanced summary of what was done and what was found                                                                                                            | 1       |
| <b>Introduction</b>       |                              |                                                                                                                                                                                                                |         |
| 2                         | Background/rationale         | Explain the scientific background and rationale for the investigation being reported                                                                                                                           | 2       |
| 3                         | Objectives                   | State specific objectives, including any prespecified hypotheses                                                                                                                                               | 2, 5    |
| <b>Methods</b>            |                              |                                                                                                                                                                                                                |         |
| 4                         | Study design                 | Present key elements of study design early in the paper                                                                                                                                                        | 2       |
| 5                         | Setting                      | Describe the setting, locations, and relevant dates, including periods of recruitment, exposure, follow-up, and data collection                                                                                | 2       |
| 6                         |                              | (a) Give the eligibility criteria, and the sources and methods of selection of participants. Describe methods of follow-up                                                                                     | 2-5     |
|                           | Participants                 | (b) For matched studies, give matching criteria and number of exposed and unexposed                                                                                                                            |         |
| 7                         | Variables                    | Clearly define all outcomes, exposures, predictors, potential confounders, and effect modifiers. Give diagnostic criteria, if applicable                                                                       | 2-5     |
| 8*                        | Data sources/<br>measurement | For each variable of interest, give sources of data and details of methods of assessment (measurement). Describe comparability of assessment methods if there is more than one group                           | 3-5     |
| 9                         | Bias                         | Describe any efforts to address potential sources of bias                                                                                                                                                      | 3-5     |
| 10                        | Study size                   | Explain how the study size was arrived at                                                                                                                                                                      | NA      |
| 11                        | Quantitative<br>variables    | Explain how quantitative variables were handled in the analyses. If applicable, describe which groupings were chosen and why                                                                                   | 3-6     |
| 12                        |                              | (a) Describe all statistical methods, including those used to control for confounding                                                                                                                          | 5-6     |
|                           |                              | (b) Describe any methods used to examine subgroups and interactions                                                                                                                                            | 5-6     |
|                           |                              | (c) Explain how missing data were addressed                                                                                                                                                                    |         |
|                           |                              | (d) If applicable, explain how loss to follow-up was addressed                                                                                                                                                 | NA      |
|                           | Statistical methods          | (e) Describe any sensitivity analyses                                                                                                                                                                          | NA      |
| <b>Results</b>            |                              |                                                                                                                                                                                                                |         |
| 13*                       |                              | (a) Report numbers of individuals at each stage of study—e.g. numbers potentially eligible, examined for eligibility, confirmed eligible, included in the study, completing follow-up, and analysed            | 5       |
|                           | Participants                 | (b) Give reasons for non-participation at each stage                                                                                                                                                           | Fig. 1  |
|                           |                              | (c) Consider use of a flow diagram                                                                                                                                                                             | Fig. 1  |
| 14*                       |                              | (a) Give characteristics of study participants (e.g., demographic, clinical, social) and information on exposures and potential confounders                                                                    | Table 2 |
|                           |                              | (b) Indicate number of participants with missing data for each variable of interest                                                                                                                            |         |
|                           | Descriptive data             | (c) Summarise follow-up time (e.g., average and total amount)                                                                                                                                                  | Tables  |
| 15*                       | Outcome data                 | Report numbers of outcome events or summary measures over time                                                                                                                                                 | Tables  |
|                           |                              | (a) Give unadjusted estimates and, if applicable, confounder-adjusted estimates and their precision (e.g., 95% confidence interval). Make clear which confounders were adjusted for and why they were included |         |
| 16                        |                              | (b) Report category boundaries when continuous variables were categorized                                                                                                                                      | Tables  |
|                           |                              | (c) If relevant, consider translating estimates of relative risk into absolute risk for a meaningful time period                                                                                               |         |
|                           | Main results                 |                                                                                                                                                                                                                | NA      |
| 17                        | Other analyses               | Report other analyses done—e.g., analyses of subgroups and interactions, and sensitivity analyses                                                                                                              | 5-6     |
| <b>Discussion</b>         |                              |                                                                                                                                                                                                                |         |
| 18                        | Key results                  | Summarise key results with reference to study objectives                                                                                                                                                       | 13      |

|                          |                  |                                                                                                                                                                            |       |
|--------------------------|------------------|----------------------------------------------------------------------------------------------------------------------------------------------------------------------------|-------|
| 19                       | Limitations      | Discuss limitations of the study, taking into account sources of potential bias or imprecision. Discuss both direction and magnitude of any potential bias                 | 16    |
| 20                       | Interpretation   | Give a cautious overall interpretation of results considering objectives, limitations, multiplicity of analyses, results from similar studies, and other relevant evidence | 13-16 |
| 21                       | Generalisability | Discuss the generalisability (external validity) of the study results                                                                                                      | 14-16 |
| <b>Other information</b> |                  |                                                                                                                                                                            |       |
| 22                       | Funding          | Give the source of funding and the role of the funders for the present study and, if applicable, for the original study on which the present article is based              | 17    |

\*Give information separately for exposed and unexposed groups.

**Table S2.** Comparison of patients with and without targeted antimycotic prophylaxis (n = 224).

| Characteristics                                                             | NO TAP<br>(n = 119) | TAP<br>(n = 105) | OR    | 95% CI |        | Missing<br>Data<br>(n/Total) |
|-----------------------------------------------------------------------------|---------------------|------------------|-------|--------|--------|------------------------------|
|                                                                             |                     |                  |       | lower  | upper  |                              |
| Age (years)                                                                 | 58.6 ±10.1          | 55.7 ±11.7       | 0.98  | 0.95   | 1.00   | 0 / 224                      |
| Male sex                                                                    | 94 (79.0)           | 78 (74.3)        | 1.30  | 0.70   | 2.42   | 0 / 224                      |
| Weight (kg)                                                                 | 83.3 ±15.0          | 79.5 ±17.9       | 0.99  | 0.97   | 1.00   | 0 / 224                      |
| Height (cm)                                                                 | 174.8 ±8.2          | 174.0 ±8.8       | 0.99  | 0.96   | 1.02   | 0 / 224                      |
| Body mass index (kg/m2)                                                     | 27.3 ±4.5           | 26.2 ±5.4        | 0.96  | 0.91   | 1.01   | 0 / 224                      |
| SAPS III score                                                              | 44.5 ±8.8           | 45.5 ±8.2        | 1.01  | 0.98   | 1.05   | 7 / 224                      |
| MELD score                                                                  | 12 (6-34)           | 15 (6-40)        | 1.09  | 1.04   | 1.13   | 7 / 224                      |
| Charlson comorbidity index                                                  | 4 (0-12)            | 4 (0-10)         | 1.02  | 0.92   | 1.14   | 2 / 224                      |
| <b>Underlying disease: malignancy and other tumors (reference category)</b> |                     |                  |       |        |        | 0 / 224                      |
| Alcoholic liver disease                                                     | 30 (25.2)           | 26 (24.8)        | 1.41  | 0.7    | 2.77   |                              |
| Virus related                                                               | 4 (3.4)             | 5 (4.8)          | 2.04  | 0.51   | 8.10   |                              |
| Non-alcoholic fatty liver disease                                           | 9 (7.6)             | 5 (4.8)          | 0.91  | 0.28   | 2.92   |                              |
| Budd-Chiari syndrome                                                        | 5 (4.2)             | 1 (1.0)          | 0.33  | 0.04   | 2.90   |                              |
| Acute liver failure                                                         | 0 (0.0)             | 10 (9.5)         | -     | -      | -      |                              |
| Cholestatic                                                                 | 5 (4.2)             | 12 (11.4)        | 3.91  | 1.27   | 12.04  |                              |
| Autoimmune hepatitis                                                        | 4 (3.4)             | 4 (3.8)          | 1.63  | 0.38   | 6.93   |                              |
| Metabolic Liver Disease                                                     | 5 (4.2)             | 5 (4.8)          | 1.63  | .44    | 6.03   |                              |
| Other                                                                       | 0 (0.0)             | 2 (1.9)          | -     | -      | -      |                              |
| <b>Preoperative risk factors</b>                                            |                     |                  |       |        |        |                              |
| MELD Score >30                                                              | 2 (1.7)             | 18 (17.1)        | 12.10 | 2.74   | 53.54  | 7/224                        |
| Fungal colonization at baseline                                             | 1 (0.8)             | 14 (13.3)        | 18.15 | 2.34   | 140.61 | 0/224                        |
| Antiinfective pretreatment                                                  | 1 (0.8)             | 29 (27.6)        | 45.03 | 6.01   | 337.46 | 45.026                       |
| Pretransplant serum creatinine >2 mg/dl                                     | 6 (5.0)             | 15 (14.3)        | 3.14  | 1.17   | 8.42   | 0/224                        |
| <b>Operative risk factors</b>                                               |                     |                  |       |        |        |                              |
| Choledochojejunostomy, any time                                             | 5 (4.2)             | 19 (18.1)        | 5.04  | 1.81   | 14.03  | 1/224                        |
| Choledochojejunostomy, primary                                              | 5 (4.2)             | 10 (9.5)         | 2.40  | 0.79   | 7.26   | 1/224                        |
| Transplantation time >11 hours                                              | 2 (1.7)             | 2 (1.9)          | 1.13  | 0.16   | 8.14   | 2/224                        |
| Intraoperative blood transfusion >40 PRBC                                   | 0 (0.0)             | 2 (1.9)          | -     | -      | -      | 2/224                        |
| Split liver transplantation                                                 | 0 (0.0)             | 6 (5.7)          | -     | -      | -      | 0/224                        |
| Donor derived infection                                                     | 0 (0.0)             | 7 (6.7)          | -     | -      | -      | 0/224                        |
| High-urgency transplantation                                                | 0 (0.0)             | 9 (8.6)          | -     | -      | -      | 0/224                        |
| <b>Postoperative risk factors</b>                                           |                     |                  |       |        |        |                              |
| Bile leak (all)                                                             | 3 (2.5)             | 31 (29.5)        | 16.06 | 4.74   | 54.42  | 1/224                        |
| Relaparotomy, any reason                                                    | 17 (14.3)           | 60 (57.1)        | 8.00  | 4.21   | 15.21  | 1/224                        |
| Relaparotomy, bile leak related                                             | 0 (0.0)             | 29 (27.6)        | -     | -      | -      | 1/224                        |
| Relaparotomy, not bile leak related                                         | 17 (4.3)            | 31 (29.5)        | 2.51  | 1.30   | 4.88   | 1/224                        |
| Posttransplant dialysis                                                     | 33 (27.7)           | 66 (62.9)        | 4.41  | 2.51   | 7.75   | 0/224                        |
| CMV viremia                                                                 | 25 (21.0)           | 39 (37.1)        | 2.22  | 1.23   | 4.02   | 0/224                        |

Abbreviations: IFI: invasive fungal infection; PRBC: packed red blood cells; MELD: model of end stage liver disease; CMV: cytomegalovirus; RRT: renal replacement therapy; OR: odds ratio, CI: confidence intervals.
